# Supplementary material
Source: PubMed Central journal article supplement (PMC6395896)
Supplement: AAC.01818-18-s0001.pdf [file AAC.01818-18-s0001.pdf]

**Supplementary Table 1. Samples collected from 10 sites in Uganda over time**

| Samples collected from different sites at different time points |                    |              |                       |              |                  |              |             |              |
|-----------------------------------------------------------------|--------------------|--------------|-----------------------|--------------|------------------|--------------|-------------|--------------|
| Site                                                            | April - June, 2016 |              | Dec, 2016 – Jan, 2017 |              | May - June, 2017 |              | Total       |              |
|                                                                 | Collected          | With results | Collected             | With results | Collected        | With results | Collected   | With results |
| Agago                                                           | 50                 | 46           | 50                    | 50           | 50               | 49           | 150         | 145          |
| Amolatar                                                        | 50                 | 50           | 50                    | 47           | 50               | 49           | 150         | 146          |
| Arua                                                            | 50                 | 41           | 50                    | 49           | 50               | 50           | 150         | 140          |
| Kole                                                            | 50                 | 44           | 50                    | 50           | 50               | 49           | 150         | 143          |
| Kanungu                                                         | 50                 | 48           | 50                    | 50           | 50               | 50           | 150         | 148          |
| Kabale                                                          | 50                 | 49           | 50                    | 50           | 19               | 18           | 119         | 117          |
| Mubende                                                         | 50                 | 49           | 50                    | 50           | 50               | 50           | 150         | 149          |
| Jinja                                                           | 50                 | 47           | 50                    | 50           | 50               | 50           | 150         | 147          |
| Tororo                                                          | 50                 | 47           | 41                    | 41           | 50               | 50           | 141         | 138          |
| Lamwo                                                           | 49                 | 42           | 50                    | 50           | 50               | 49           | 149         | 141          |
| <b>Total</b>                                                    | <b>499</b>         | <b>463</b>   | <b>491</b>            | <b>487</b>   | <b>469</b>       | <b>464</b>   | <b>1459</b> | <b>1414</b>  |

**Supplementary Table 2. Prevalence of *K13* non-synonymous single nucleotide polymorphisms at different sites in Uganda**

| Region        | Site     | N  | <i>K13</i> SNP Prevalence | SNPs Detected              |
|---------------|----------|----|---------------------------|----------------------------|
| North         | Lamwo    | 43 | 8 (19%)                   | C469Y, C469F, A675V        |
| North         | Agago    | 42 | 6 (14%)                   | C469Y, C469F, G665S, A675V |
| South West    | Kanungu  | 48 | 4 (8%)                    | G533A, I549T               |
| North West    | Arua     | 43 | 3 (7%)                    | A578S, A675V               |
| North Central | Kole     | 47 | 3 (6%)                    | C469Y, C469F, A675V        |
| East Central  | Jinja    | 48 | 2 (4%)                    | A578S                      |
| North Central | Amolatar | 48 | 1 (2%)                    | A578S                      |
| Central       | Mubende  | 45 | 1 (2%)                    | C469Y                      |
| East          | Tororo   | 48 | 1 (2%)                    | C469F                      |

N, number of samples sequenced.

**Supplementary Table 3. Frequency of detection of *K13* alleles at the indicated loci**

| Loci (N=412) | Wild Type   | Mixed    | Mutant   |
|--------------|-------------|----------|----------|
| A675V        | 404 (98.0%) | 1 (0.2%) | 7 (1.8%) |
| C469Y        | 406 (98.5%) | 3 (0.7%) | 3 (0.7%) |
| C469F        | 408 (99.0%) | 1 (0.3%) | 3 (0.7%) |
| A578S        | 409 (99.3%) | 0        | 3 (0.7%) |
| G533A        | 410 (99.5%) | 0        | 3 (0.7%) |
| I540T        | 410 (99.5%) | 0        | 2 (0.5%) |
| G665S        | 411 (99.8%) | 0        | 1 (0.2%) |

N, number of samples sequenced.

**Supplementary Table 4: Prevalence of wild type, mixed, and mutant sequences of transporter alleles at indicated sites and survey periods**

| <b>Locus</b>              | <b>Site</b> | <b>Survey</b> | <b>N</b>   | <b>Wild type</b> | <b>Mixed</b> | <b>Mutant</b> |
|---------------------------|-------------|---------------|------------|------------------|--------------|---------------|
| <b><i>Pfprt</i> K76T</b>  | Agago       | 1             | 44         | 42 (95.5%)       | 1 (2.3%)     | 1 (2.3%)      |
|                           | Agago       | 2             | 46         | 43 (93.5%)       | 0            | 3 (6.5%)      |
|                           | Agago       | 3             | 43         | 40 (93.0%)       | 2 (4.7%)     | 1 (2.3%)      |
|                           | Amolatar    | 1             | 50         | 31 (62%)         | 1 (2%)       | 18 (36%)      |
|                           | Amolatar    | 2             | 41         | 39 (95.1%)       | 0            | 2 (4.9%)      |
|                           | Amolatar    | 3             | 41         | 41 (100%)        | 0            | 0             |
|                           | Arua        | 1             | 40         | 37 (92.5%)       | 2 (5%)       | 1 (2.5%)      |
|                           | Arua        | 2             | 48         | 47 (97.9%)       | 1 (2.1%)     | 0             |
|                           | Arua        | 3             | 39         | 39 (100%)        | 0            | 0             |
|                           | Jinja       | 1             | 42         | 9 (21.4%)        | 3 (7.1%)     | 30 (71.4%)    |
|                           | Jinja       | 2             | 48         | 30 (62.5%)       | 2 (4.2%)     | 16 (33.3%)    |
|                           | Jinja       | 3             | 41         | 28 (68.3%)       | 4 (9.8%)     | 9 (22%)       |
|                           | Kabale      | 1             | 49         | 44 (89.8%)       | 1 (2%)       | 4 (8.2%)      |
|                           | Kabale      | 2             | 50         | 46 (92%)         | 1 (2%)       | 3 (6%)        |
|                           | Kabale      | 3             | 18         | 18 (100%)        | 0            | 0             |
|                           | Kanungu     | 1             | 48         | 22 (45.8%)       | 2 (4.2%)     | 24 (50%)      |
|                           | Kanungu     | 2             | 47         | 28 (59.6%)       | 4 (8.5%)     | 15 (31.9%)    |
|                           | Kanungu     | 3             | 44         | 29 (65.9%)       | 2 (4.6%)     | 13 (29.6%)    |
|                           | Kole        | 1             | 44         | 42 (95.5%)       | 1 (2.3)      | 1 (2.3%)      |
|                           | Kole        | 2             | 43         | 40 (93%)         | 1 (2.3%)     | 2 (4.6%)      |
|                           | Kole        | 3             | 40         | 38 (95%)         | 0            | 2 (5%)        |
|                           | Lamwo       | 1             | 43         | 39 (90.7%)       | 4 (9.3%)     | 0             |
|                           | Lamwo       | 2             | 46         | 46 (100%)        | 0            | 0             |
|                           | Lamwo       | 3             | 45         | 42 (93.3%)       | 2 (4.4%)     | 1 (2.2%)      |
|                           | Mubende     | 1             | 47         | 29 (61.7%)       | 7 (14.9%)    | 11 (23.4%)    |
|                           | Mubende     | 2             | 46         | 36 (78.3%)       | 2 (4.4%)     | 8 (17.4%)     |
|                           | Mubende     | 3             | 42         | 33 (78.6%)       | 3 (7.1%)     | 6 (14.3%)     |
| Tororo                    | 1           | 46            | 23 (50%)   | 5 (10.9%)        | 18 (38.1%)   |               |
| Tororo                    | 2           | 36            | 23 (63.9%) | 4 (11.1%)        | 9 (25%)      |               |
| Tororo                    | 3           | 46            | 33 (71.7%) | 1 (2.2%)         | 12 (26.1%)   |               |
| <b><i>Pfmdr1</i> N86Y</b> | Agago       | 1             | 44         | 44 (100%)        | 0            | 0             |
|                           | Agago       | 2             | 43         | 43 (100%)        | 0            | 0             |
|                           | Agago       | 3             | 43         | 43 (100%)        | 0            | 0             |
|                           | Amolatar    | 1             | 50         | 49 (98%)         | 1 (2%)       | 0             |
|                           | Amolatar    | 2             | 40         | 40 (100%)        | 0            | 0             |
|                           | Amolatar    | 3             | 41         | 41 (100%)        | 0            | 0             |

|                         |          |   |    |            |           |            |
|-------------------------|----------|---|----|------------|-----------|------------|
|                         | Arua     | 1 | 38 | 37 (97.4%) | 1 (2.6%)  | 0          |
|                         | Arua     | 2 | 47 | 47 (100%)  | 0         | 0          |
|                         | Arua     | 3 | 41 | 41 (100%)  | 0         | 0          |
|                         | Jinja    | 1 | 47 | 44 (93.6%) | 2(4.4)    | 1(2.1%)    |
|                         | Jinja    | 2 | 45 | 44 (97.8%) | 1 (2.2%)  | 0          |
|                         | Jinja    | 3 | 38 | 38 (100%)  | 0         | 0          |
|                         | Kabale   | 1 | 49 | 48 (98%)   | 0         | 1 (2%)     |
|                         | Kabale   | 2 | 50 | 50 (100%)  | 0         | 0          |
|                         | Kabale   | 3 | 18 | 18 (100%)  | 0         | 0          |
|                         | Kanungu  | 1 | 48 | 46 (95.8%) | 2 (4.2%)  | 0          |
|                         | Kanungu  | 2 | 46 | 44 (95.6%) | 2 (4.4%)  | 0          |
|                         | Kanungu  | 3 | 46 | 46 (100%)  | 0         | 0          |
|                         | Kole     | 1 | 43 | 43 (100%)  | 0         | 0          |
|                         | Kole     | 2 | 43 | 43 (100%)  | 0         | 0          |
|                         | Kole     | 3 | 37 | 37 (100%)  | 0         | 0          |
|                         | Lamwo    | 1 | 42 | 42 (100%)  | 0         | 0          |
|                         | Lamwo    | 2 | 41 | 41 (100%)  | 0         | 0          |
|                         | Lamwo    | 3 | 44 | 44 (100%)  | 0         | 0          |
|                         | Mubende  | 1 | 48 | 48 (100%)  | 0         | 0          |
|                         | Mubende  | 2 | 45 | 45 (100%)  | 0         | 0          |
|                         | Mubende  | 3 | 41 | 41 (100%)  | 0         | 0          |
|                         | Tororo   | 1 | 45 | 40 (89.9)  | 5 (11.1)  | 0          |
|                         | Tororo   | 2 | 35 | 35 (100%)  | 0         | 0          |
|                         | Tororo   | 3 | 42 | 42 (100%)  | 0         | 0          |
| <b>Pfmdr1<br/>Y184F</b> | Agago    | 1 | 45 | 10 (22.2%) | 20(44.4%) | 15 (33.3%) |
|                         | Agago    | 2 | 41 | 17 (41.5%) | 15(36.6%) | 9 (22%)    |
|                         | Agago    | 3 | 45 | 12 (26.7%) | 21(46.7%) | 12 (26.7%) |
|                         | Amolatar | 1 | 50 | 0          | 1 (%)     | 49 (98%)   |
|                         | Amolatar | 2 | 40 | 15 (37.5%) | 9 (22.5%) | 16 (40%)   |
|                         | Amolatar | 3 | 45 | 15 (33.35) | 21(46.7%) | 9 (20%)    |
|                         | Arua     | 1 | 38 | 9 (23.7%)  | 19 (50%)  | 10 (26.3%) |
|                         | Arua     | 2 | 47 | 14 (29.8%) | 18(38.3%) | 15 (31.9%) |
|                         | Arua     | 3 | 41 | 10 (24.4%) | 15(36.6%) | 16 (39%)   |
|                         | Jinja    | 1 | 47 | 11 (23.4%) | 16 (34%)  | 20 (42.6%) |
|                         | Jinja    | 2 | 46 | 17 (37%)   | 19(41.3%) | 10 (21.7%) |
|                         | Jinja    | 3 | 45 | 14 (31.1%) | 19(42.2%) | 12 (26.7%) |
|                         | Kabale   | 1 | 49 | 22 (44.9%) | 19(38.8%) | 8 (16.3%)  |
|                         | Kabale   | 2 | 50 | 16 (32%)   | 12 (24%)  | 22 (44%)   |
|                         | Kabale   | 3 | 18 | 7 (38.9%)  | 5 (27.8%) | 6 (33.3%)  |
|                         | Kanungu  | 1 | 48 | 21 (43.8%) | 18(37.5%) | 9 (18.8%)  |

|                          |          |   |    |            |           |            |
|--------------------------|----------|---|----|------------|-----------|------------|
|                          | Kanungu  | 2 | 45 | 21 (46.7%) | 14(31.1%) | 10 (22.2%) |
|                          | Kanungu  | 3 | 47 | 24 (51%)   | 10(21.3%) | 13 (27.7%) |
|                          | Kole     | 1 | 43 | 9 (20.1%)  | 26(60.5%) | 8 (18.6%)  |
|                          | Kole     | 2 | 43 | 19 (44.2%) | 13(30.2%) | 11 (25.6%) |
|                          | Kole     | 3 | 42 | 13 (31%)   | 23(54.8%) | 6 (14.3%)  |
|                          | Lamwo    | 1 | 42 | 8 (19.1%)  | 9 (21.4%) | 25 (59.5%) |
|                          | Lamwo    | 2 | 40 | 9 (22.5%)  | 17(42.5%) | 14 (35%)   |
|                          | Lamwo    | 3 | 47 | 17 (36.2%) | 20(42.6%) | 10 (21.3%) |
|                          | Mubende  | 1 | 48 | 25 (52.1%) | 17(35.4%) | 6 (12.5%)  |
|                          | Mubende  | 2 | 44 | 30 (68.2%) | 6 (13.6%) | 8 (18.2%)  |
|                          | Mubende  | 3 | 45 | 17 (37.8%) | 24(53.3%) | 4 (8.9%)   |
|                          | Tororo   | 1 | 46 | 19 (41.3%) | 8 (17.4%) | 19 (41.3%) |
|                          | Tororo   | 2 | 37 | 15 (40.5%) | 5 (13.5%) | 17 (45.9%) |
|                          | Tororo   | 3 | 46 | 26 (56.5%) | 9 (19.6%) | 11 (23.9%) |
| <b>Pfmdr1<br/>Y1246D</b> | Agago    | 1 | 40 | 37 (92.5%) | 2(5%)     | 1 (2.5%)   |
|                          | Agago    | 2 | 42 | 39 (92.9%) | 0         | 3 (7.1%)   |
|                          | Agago    | 3 | 42 | 42 (100%)  | 0         | 0          |
|                          | Amolatar | 1 | 50 | 50 (100%)  | 0         | 0          |
|                          | Amolatar | 2 | 40 | 37 (92.5%) | 0         | 3 (7.5%)   |
|                          | Amolatar | 3 | 40 | 40 (100%)  | 0         | 0          |
|                          | Arua     | 1 | 35 | 35 (100%)  | 0         | 0          |
|                          | Arua     | 2 | 48 | 48 (100%)  | 0         | 0          |
|                          | Arua     | 3 | 41 | 40 (97.6%) | 1 (2.4%)  | 0          |
|                          | Jinja    | 1 | 41 | 35 (85.4%) | 4 (9.8%)  | 2 (4.8%)   |
|                          | Jinja    | 2 | 48 | 46 (95.8%) | 0         | 2 (4.2%)   |
|                          | Jinja    | 3 | 40 | 39 (97.5%) | 1 (2.5%)  | 0          |
|                          | Kabale   | 1 | 49 | 45(91.8%)  | 1 (2%)    | 3 (6)      |
|                          | Kabale   | 2 | 49 | 49 (100%)  | 0         | 0          |
|                          | Kabale   | 3 | 17 | 16 (94.1%) | 0         | 1 (5.9%)   |
|                          | Kanungu  | 1 | 46 | 41 (89.1%) | 4 (8.7%)  | 1 (2.2%)   |
|                          | Kanungu  | 2 | 45 | 41 (91.1%) | 1 (2.2%)  | 3 (6.7%)   |
|                          | Kanungu  | 3 | 43 | 38 (88.4%) | 4 (9.3%)  | 1 (2.3%)   |
|                          | Kole     | 1 | 42 | 41 (97.6%) | 0         | 1 (2.4%)   |
|                          | Kole     | 2 | 41 | 40 (97.7)  | 0         | 1 (2.4%)   |
|                          | Kole     | 3 | 40 | 40 (100%)  | 0         | 0          |
|                          | Lamwo    | 1 | 37 | 37 (100%)  | 0         | 0          |
|                          | Lamwo    | 2 | 46 | 46 (100%)  | 0         | 0          |
|                          | Lamwo    | 3 | 39 | 38 (97.4%) | 1 (2.6%)  | 0          |
|                          | Mubende  | 1 | 47 | 41 (87.2%) | 1 (2.1%)  | 5 (10.6%)  |
|                          | Mubende  | 2 | 46 | 43 (93.5%) | 1 (2.2%)  | 2 (4.4%)   |

|  |         |   |    |            |          |           |
|--|---------|---|----|------------|----------|-----------|
|  | Mubende | 3 | 39 | 33 (84.6%) | 2 (5.1%) | 4 (10.3%) |
|  | Tororo  | 1 | 47 | 39 (83.9%) | 4 (8.5%) | 4 (8.5%)  |
|  | Tororo  | 2 | 35 | 31 (88.6%) | 1 (2.9%) | 3 (8.6%)  |
|  | Tororo  | 3 | 47 | 41 (87.2%) | 2 (4.3%) | 4 (8.5%)  |

N, number of samples.

**Supplementary Table 5. Prevalence of wild type, mixed, and mutant sequences of antifolate alleles at indicated sites and survey periods**

| Locus                        | Site     | Survey | N  | Wild type | Mixed    | Mutant     |
|------------------------------|----------|--------|----|-----------|----------|------------|
| <i>Pfdhfr</i><br><i>N51I</i> | Agago    | 1      | 42 | 0         | 0        | 42 (100%)  |
|                              | Agago    | 2      | 44 | 2 (4.6%)  | 0        | 42 (95.5%) |
|                              | Agago    | 3      | 42 | 0         | 0        | 42 (100%)  |
|                              | Amolatar | 1      | 50 | 0         | 0        | 50 (100%)  |
|                              | Amolatar | 2      | 42 | 4 (9.5%)  | 0        | 38 (90.5%) |
|                              | Amolatar | 3      | 39 | 0         | 0        | 39 (100%)  |
|                              | Arua     | 1      | 33 | 0         | 0        | 33 (100%)  |
|                              | Arua     | 2      | 41 | 0         | 1 (2.4%) | 40 (97.6%) |
|                              | Arua     | 3      | 44 | 0         | 0        | 44 (100%)  |
|                              | Jinja    | 1      | 46 | 0         | 0        | 46 (100%)  |
|                              | Jinja    | 2      | 40 | 0         | 0        | 40 (100%)  |
|                              | Jinja    | 3      | 44 | 0         | 0        | 44 (100%)  |
|                              | Kabale   | 1      | 42 | 0         | 0        | 42 (100%)  |
|                              | Kabale   | 2      | 48 | 0         | 2 (4.2%) | 46 (95.8%) |
|                              | Kabale   | 3      | 18 | 0         | 0        | 18 (100%)  |
|                              | Kanungu  | 1      | 44 | 0         | 0        | 44 (100%)  |
|                              | Kanungu  | 2      | 43 | 1 (2.35%) | 0        | 42 (97.7%) |
|                              | Kanungu  | 3      | 47 | 0         | 0        | 47 (100%)  |
|                              | Kole     | 1      | 37 | 0         | 0        | 37 (100%)  |
|                              | Kole     | 2      | 27 | 0         | 0        | 27 (100%)  |
|                              | Kole     | 3      | 42 | 0         | 0        | 42 (100%)  |
|                              | Lamwo    | 1      | 35 | 1         | 0        | 34 (97.1%) |
|                              | Lamwo    | 2      | 41 | 0         | 0        | 41 (100%)  |
|                              | Lamwo    | 3      | 46 | 0         | 1 (2.2%) | 45 (97.8%) |
|                              | Mubende  | 1      | 47 | 0         | 0        | 47 (100%)  |
|                              | Mubende  | 2      | 44 | 0         | 0        | 44 (100%)  |
|                              | Mubende  | 3      | 44 | 0         | 0        | 44 (100%)  |
|                              | Tororo   | 1      | 47 | 0         | 0        | 47 (100%)  |

|                         |          |   |    |            |            |            |
|-------------------------|----------|---|----|------------|------------|------------|
|                         | Tororo   | 2 | 34 | 0          | 1 (2.9%)   | 33 (97.1%) |
|                         | Tororo   | 3 | 45 | 0          | 0          | 45 (100%)  |
| <b>Pfdhfr<br/>C59R</b>  | Agago    | 1 | 42 | 4 (9.5%)   | 5 (11.9%)  | 33 (78.6%) |
|                         | Agago    | 2 | 44 | 4 (9.1%)   | 7 (15.9%)  | 33 (75%)   |
|                         | Agago    | 3 | 42 | 4 (9.5%)   | 7 (16.7%)  | 31 (73.8%) |
|                         | Amolatar | 1 | 50 | 0          | 0          | 50 (100%)  |
|                         | Amolatar | 2 | 45 | 1 (2.2%)   | 1 (2.2%)   | 43 (95.6%) |
|                         | Amolatar | 3 | 39 | 2 (5.1%)   | 5 (12.8%)  | 32 (82.1%) |
|                         | Arua     | 1 | 33 | 11 (33.3%) | 3 (9.1%)   | 19 (57.6%) |
|                         | Arua     | 2 | 41 | 4 (9.8%)   | 12 (29.3%) | 25 (60.1%) |
|                         | Arua     | 3 | 44 | 7 (15.9%)  | 18 (40.9%) | 19 (43.2%) |
|                         | Jinja    | 1 | 46 | 0          | 1 (2.2%)   | 45 (97.8%) |
|                         | Jinja    | 2 | 40 | 0          | 0          | 40 (100%)  |
|                         | Jinja    | 3 | 43 | 0          | 3 (7%)     | 40 (93%)   |
|                         | Kabale   | 1 | 47 | 3 (6.4%)   | 1 (2.1%)   | 43 (91.5%) |
|                         | Kabale   | 2 | 48 | 2 (4.2%)   | 5 (10.4%)  | 41 (85.4%) |
|                         | Kabale   | 3 | 18 | 2 (11.1%)  | 1 (5.6%)   | 15 (83.3%) |
|                         | Kanungu  | 1 | 46 | 3 (6.5%)   | 0          | 43 (93.5%) |
|                         | Kanungu  | 2 | 43 | 2 (4.6%)   | 3 (7%)     | 38 (88.4%) |
|                         | Kanungu  | 3 | 46 | 1 (2.2%)   | 2 (4.4%)   | 43 (93.5%) |
|                         | Kole     | 1 | 37 | 3 (8.1%)   | 7 (18.9%)  | 27 (73%)   |
|                         | Kole     | 2 | 27 | 0          | 0          | 27 (100%)  |
|                         | Kole     | 3 | 42 | 2 (4.8%)   | 3 (7.1%)   | 37 (88.15) |
|                         | Lamwo    | 1 | 35 | 5 (14.3%)  | 5 (14.3%)  | 25 (71.4%) |
|                         | Lamwo    | 2 | 40 | 3 (7.5%)   | 10 (25%)   | 27 (67.5%) |
|                         | Lamwo    | 3 | 46 | 4 (8.7%)   | 13 (28.3%) | 29 (63%)   |
|                         | Mubende  | 1 | 47 | 2 (4.3%)   | 1 (2.1%)   | 44 (93.6%) |
|                         | Mubende  | 2 | 42 | 2 (4.8%)   | 4 (9.5%)   | 36 (85.7%) |
|                         | Mubende  | 3 | 44 | 0          | 1 (2.3%)   | 43 (97.7%) |
|                         | Tororo   | 1 | 47 | 3 (6.4%)   | 0          | 44 (93.6%) |
|                         | Tororo   | 2 | 34 | 0          | 3 (8.8%)   | 31 (91.2%) |
|                         | Tororo   | 3 | 45 | 2 (4.4%)   | 2 (4.4%)   | 41 (91.1%) |
| <b>Pfdhfr<br/>S108N</b> | Agago    | 1 | 42 | 0          | 0          | 42 (100%)  |
|                         | Agago    | 2 | 44 | 0          | 1 (2.3%)   | 43 (97.7%) |
|                         | Agago    | 3 | 42 | 0          | 0          | 42 (100%)  |
|                         | Amolatar | 1 | 50 | 0          | 0          | 50 (100%)  |
|                         | Amolatar | 2 | 45 | 1 (2.2%)   | 0          | 44 (97.8%) |
|                         | Amolatar | 3 | 39 | 0          | 0          | 39 (100%)  |

|                         |          |   |    |            |          |            |
|-------------------------|----------|---|----|------------|----------|------------|
|                         | Arua     | 1 | 33 | 0          | 0        | 33 (100%)  |
|                         | Arua     | 2 | 41 | 0          | 1 (2.4%) | 40 (97.6%) |
|                         | Arua     | 3 | 44 | 0          | 0        | 44 (100%)  |
|                         | Jinja    | 1 | 45 | 0          | 0        | 45 (100%)  |
|                         | Jinja    | 2 | 42 | 0          | 0        | 42 (100%)  |
|                         | Jinja    | 3 | 41 | 0          | 0        | 41 (100%)  |
|                         | Kabale   | 1 | 47 | 0          | 0        | 47 (100%)  |
|                         | Kabale   | 2 | 49 | 0          | 0        | 49 (100%)  |
|                         | Kabale   | 3 | 18 | 0          | 0        | 18 (100%)  |
|                         | Kanungu  | 1 | 47 | 0          | 0        | 47 (100%)  |
|                         | Kanungu  | 2 | 42 | 0          | 0        | 42 (100%)  |
|                         | Kanungu  | 3 | 45 | 0          | 0        | 45 (100%)  |
|                         | Kole     | 1 | 37 | 0          | 0        | 37 (100%)  |
|                         | Kole     | 2 | 27 | 0          | 0        | 27 (100%)  |
|                         | Kole     | 3 | 43 | 0          | 0        | 43 (100%)  |
|                         | Lamwo    | 1 | 35 | 0          | 0        | 35 (100%)  |
|                         | Lamwo    | 2 | 43 | 0          | 0        | 43 (100%)  |
|                         | Lamwo    | 3 | 46 | 0          | 1 (2.2%) | 45 (97.8%) |
|                         | Mubende  | 1 | 46 | 0          | 0        | 46 (100%)  |
|                         | Mubende  | 2 | 44 | 0          | 0        | 44 (100%)  |
|                         | Mubende  | 3 | 44 | 0          | 0        | 44 (100%)  |
|                         | Tororo   | 1 | 47 | 0          | 0        | 47 (100%)  |
|                         | Tororo   | 2 | 34 | 0          | 0        | 34 (100%)  |
|                         | Tororo   | 3 | 45 | 0          | 0        | 45 (100%)  |
| <b>Pfdhfr<br/>I164L</b> | Agago    | 1 | 41 | 40 (97.6%) | 1 (2.4%) | 0          |
|                         | Agago    | 2 | 44 | 44 (100%)  | 0        | 0          |
|                         | Agago    | 3 | 42 | 42 (100%)  | 0        | 0          |
|                         | Amolatar | 1 | 50 | 50 (100%)  | 0        | 0          |
|                         | Amolatar | 2 | 45 | 44 (97.8%) | 1 (2.2%) | 0          |
|                         | Amolatar | 3 | 39 | 39 (100%)  | 0        | 0          |
|                         | Arua     | 1 | 33 | 33 (100%)  | 0        | 0          |
|                         | Arua     | 2 | 41 | 41 (100%)  | 0        | 0          |
|                         | Arua     | 3 | 44 | 44 (100%)  | 0        | 0          |
|                         | Jinja    | 1 | 44 | 44 (100%)  | 0        | 0          |
|                         | Jinja    | 2 | 42 | 40 (95.2%) | 1 (2.4%) | 1 (2.4%)   |
|                         | Jinja    | 3 | 42 | 36 (85.7%) | 2 (4.8%) | 4 (9.5%)   |
|                         | Kabale   | 1 | 43 | 43 (100%)  | 0        | 0          |
|                         | Kabale   | 2 | 49 | 48 (98%)   | 0        | 1 (2%)     |

|                         |          |   |    |            |           |            |
|-------------------------|----------|---|----|------------|-----------|------------|
|                         | Kabale   | 3 | 18 | 18 (100%)  | 0         | 0          |
|                         | Kanungu  | 1 | 45 | 38 (84.4%) | 1 (2.2%)  | 6 (13.3%)  |
|                         | Kanungu  | 2 | 42 | 38 (90.5%) | 1 (2.4%)  | 3 (7.15)   |
|                         | Kanungu  | 3 | 45 | 40 (88.9%) | 1 (2.2%)  | 4 (8.9%)   |
|                         | Kole     | 1 | 37 | 36 (97.3%) | 0         | 1 (2.7%)   |
|                         | Kole     | 2 | 27 | 26 (96.3%) | 0         | 1 (3.7%)   |
|                         | Kole     | 3 | 43 | 42 (97.7%) | 0         | 1 (2.3%)   |
|                         | Lamwo    | 1 | 34 | 34 (100%)  | 0         | 0          |
|                         | Lamwo    | 2 | 43 | 43 (100%)  | 0         | 0          |
|                         | Lamwo    | 3 | 46 | 44 (95.7%) | 2 (4.4%)  | 0          |
|                         | Mubende  | 1 | 44 | 30 (68.2%) | 8 (18.2%) | 6 (13.6%)  |
|                         | Mubende  | 2 | 44 | 38 (86.4%) | 4 (9.1%)  | 2 (4.6%)   |
|                         | Mubende  | 3 | 44 | 39 (88.9%) | 0         | 5 (11.4%)  |
|                         | Tororo   | 1 | 47 | 47 (100%)  | 0         | 0          |
|                         | Tororo   | 2 | 34 | 34 (100%)  | 0         | 0          |
|                         | Tororo   | 3 | 45 | 44 (97.8%) | 0         | 1 (2.2%)   |
| <b>Pfdhps<br/>A437G</b> | Agago    | 1 | 42 | 4 (9.5%)   | 5 (11.9%) | 33 (78.6%) |
|                         | Agago    | 2 | 43 | 2 (4.7%)   | 4 (9.3%)  | 37 (86.1%) |
|                         | Agago    | 3 | 43 | 3 (7%)     | 2 (4.7%)  | 38 (88.4%) |
|                         | Amolatar | 1 | 50 | 0          | 0         | 50 (100%)  |
|                         | Amolatar | 2 | 44 | 0          | 0         | 44 (100%)  |
|                         | Amolatar | 3 | 39 | 7 (17.9%)  | 0         | 32 (82.1%) |
|                         | Arua     | 1 | 31 | 0          | 1 (3.2%)  | 30 (96.8%) |
|                         | Arua     | 2 | 39 | 0          | 3 (7.7%)  | 36 (92.3%) |
|                         | Arua     | 3 | 44 | 3 (6.8%)   | 1 (2.3%)  | 40 (90.9%) |
|                         | Jinja    | 1 | 45 | 0          | 0         | 45 (100%)  |
|                         | Jinja    | 2 | 42 | 0          | 0         | 42 (100%)  |
|                         | Jinja    | 3 | 42 | 0          | 0         | 42 (100%)  |
|                         | Kabale   | 1 | 45 | 0          | 1 (2.2%)  | 44 (97.8%) |
|                         | Kabale   | 2 | 48 | 0          | 0         | 48 (100%)  |
|                         | Kabale   | 3 | 18 | 0          | 0         | 18 (100%)  |
|                         | Kanungu  | 1 | 45 | 0          | 0         | 45 (100%)  |
|                         | Kanungu  | 2 | 42 | 1 (2.4%)   | 0         | 41 (97.6%) |
|                         | Kanungu  | 3 | 46 | 0          | 0         | 46 (100%)  |
|                         | Kole     | 1 | 35 | 0          | 2 (5.7%)  | 33 (94.3%) |
|                         | Kole     | 2 | 27 | 1 (3.7%)   | 1 (3.7%)  | 25 (92.6%) |
|                         | Kole     | 3 | 43 | 0          | 0         | 43 (100%)  |
|                         | Lamwo    | 1 | 34 | 6 (17.7%)  | 1 (2.9%)  | 27 (79.4%) |



|                         |          |   |    |          |           |            |
|-------------------------|----------|---|----|----------|-----------|------------|
|                         | Lamwo    | 2 | 39 | 0        | 2 (5.1%)  | 37 (94.9%) |
|                         | Lamwo    | 3 | 46 | 3 (6.5%) | 1 (2.2%)  | 42 (91.3%) |
|                         | Mubende  | 1 | 42 | 0        | 2 (4.76%) | 40 (95.2%) |
|                         | Mubende  | 2 | 44 | 1 (2.3%) | 3 (6.8%)  | 40 (90.9%) |
|                         | Mubende  | 3 | 43 | 0        | 0         | 43 (100%)  |
|                         | Tororo   | 1 | 46 | 0        | 0         | 46 (100%)  |
|                         | Tororo   | 2 | 32 | 0        | 0         | 32 (100%)  |
|                         | Tororo   | 3 | 43 | 0        | 1 2.3%    | 42 (97.7%) |
| <b>Pfdhps<br/>K540E</b> | Agago    | 1 | 42 | 2 (4.8%) | 6 (14.3%) | 34 (81%)   |
|                         | Agago    | 2 | 43 | 2 (4.7%) | 3 (7%)    | 38 (88.4%) |
|                         | Agago    | 3 | 43 | 3 (7%)   | 1 (2.3%)  | 39 (90.7%) |
|                         | Amolatar | 1 | 50 | 0        | 0         | 50 (100%)  |
|                         | Amolatar | 2 | 44 | 4 (9%)   | 0         | 40 (91%)   |
|                         | Amolatar | 3 | 39 | 2 (5.1%) | 4 (10.2%) | 33 (84.6%) |
|                         | Arua     | 1 | 33 | 0        | 0         | 33 (100%)  |
|                         | Arua     | 2 | 40 | 1 (2.5%) | 3 (7.5%)  | 36 (90%)   |
|                         | Arua     | 3 | 44 | 2 (4.6%) | 2 (4.6%)  | 40 (90.9%) |
|                         | Jinja    | 1 | 46 | 0        | 0         | 46 (100%)  |
|                         | Jinja    | 2 | 42 | 0        | 0         | 42 (100%)  |
|                         | Jinja    | 3 | 42 | 0        | 0         | 42 (100%)  |
|                         | Kabale   | 1 | 47 | 0        | 0         | 47 (100%)  |
|                         | Kabale   | 2 | 48 | 0        | 0         | 48 (100%)  |
|                         | Kabale   | 3 | 18 | 0        | 0         | 18 (100%)  |
|                         | Kanungu  | 1 | 45 | 1 (2.2%) | 0         | 44 (97.8%) |
|                         | Kanungu  | 2 | 42 | 1 (2.4%) | 0         | 41 (97.6%) |
|                         | Kanungu  | 3 | 46 | 0        | 0         | 46 (100%)  |
|                         | Kole     | 1 | 36 | 0        | 0         | 36 (100%)  |
|                         | Kole     | 2 | 26 | 0        | 0         | 26 (100%)  |
|                         | Kole     | 3 | 43 | 0        | 0         | 43 (100%)  |
|                         | Lamwo    | 1 | 35 | 3 (8.6%) | 1 (2.9%)  | 31 (88.6%) |
|                         | Lamwo    | 2 | 40 | 0        | 1 (2.5%)  | 39 (97.5%) |
|                         | Lamwo    | 3 | 45 | 2 (4.4%) | 2 (4.4%)  | 41 (91.1%) |
|                         | Mubende  | 1 | 42 | 0        | 0         | 42 (100%)  |
|                         | Mubende  | 2 | 43 | 0        | 0         | 43 (100%)  |
|                         | Mubende  | 3 | 42 | 0        | 0         | 42 (100%)  |
|                         | Tororo   | 1 | 47 | 0        | 0         | 47 (100%)  |
|                         | Tororo   | 2 | 34 | 0        | 0         | 34 (100%)  |
|                         | Tororo   | 3 | 43 | 0        | 1 (2.3%)  | 42 (97.7%) |

|                         |          |   |    |            |            |            |
|-------------------------|----------|---|----|------------|------------|------------|
| <b>Pfdhps<br/>A581G</b> | Agago    | 1 | 42 | 39 (92.8%) | 2 (4.8%)   | 1 (2.4%)   |
|                         | Agago    | 2 | 43 | 43 (100%)  | 0          | 0          |
|                         | Agago    | 3 | 45 | 45 (100%)  | 0          | 0          |
|                         | Amolatar | 1 | 50 | 50 (100%)  | 0          | 0          |
|                         | Amolatar | 2 | 44 | 37 (84.1%) | 4 (9.1%)   | 3 (6.8%)   |
|                         | Amolatar | 3 | 39 | 39 (100%)  | 0          | 0          |
|                         | Arua     | 1 | 33 | 32 (97%)   | 1 (3%)     | 0          |
|                         | Arua     | 2 | 40 | 35 (87.5%) | 4 (10%)    | 1 (2.5%)   |
|                         | Arua     | 3 | 44 | 44 (100%)  | 0          | 0          |
|                         | Jinja    | 1 | 46 | 45 (97.8%) | 1 (2.2%)   | 0          |
|                         | Jinja    | 2 | 42 | 39 (92.8%) | 2 (4.8%)   | 1 (2.4%)   |
|                         | Jinja    | 3 | 43 | 42 (97.7%) | 0          | 1 (2.3%)   |
|                         | Kabale   | 1 | 47 | 14 (29.8%) | 3 (6.4%)   | 30 (63.8%) |
|                         | Kabale   | 2 | 48 | 19 (39.6%) | 7 (14.6%)  | 22 (45.8%) |
|                         | Kabale   | 3 | 18 | 10 (55.5%) | 0          | 8 (44.4%)  |
|                         | Kanungu  | 1 | 45 | 18 (40%)   | 7 (15.6%)  | 20 (44.4%) |
|                         | Kanungu  | 2 | 41 | 28 (68.3%) | 3 (7.3%)   | 10 (24.4%) |
|                         | Kanungu  | 3 | 46 | 29 (63%)   | 8 (17.4%)  | 9 (19.6%)  |
|                         | Kole     | 1 | 36 | 36 (100%)  | 0          | 0          |
|                         | Kole     | 2 | 27 | 27 (100%)  | 0          | 0          |
|                         | Kole     | 3 | 42 | 42 (100%)  | 0          | 0          |
|                         | Lamwo    | 1 | 35 | 35 (100%)  | 0          | 0          |
|                         | Lamwo    | 2 | 41 | 38 (92.7%) | 1 (2.4%)   | 2 (4.9%)   |
|                         | Lamwo    | 3 | 46 | 46 (100%)  | 0          | 0          |
|                         | Mubende  | 1 | 42 | 27 (64.3%) | 4 (9.5%)   | 11 (26.25) |
|                         | Mubende  | 2 | 44 | 25 (56.8%) | 12 (27.3%) | 7 (15.9%)  |
|                         | Mubende  | 3 | 44 | 29 (65.9%) | 9 (20.5%)  | 6 (13.6%)  |
|                         | Tororo   | 1 | 46 | 46 (100%)  | 0          | 0          |
|                         | Tororo   | 2 | 34 | 34 (100%)  | 0          | 0          |
|                         | Tororo   | 3 | 42 | 42 (100%)  | 0          | 0          |
| <b>Pfdhps<br/>A613S</b> | Agago    | 1 | 42 | 42 (100%)  | 0          | 0          |
|                         | Agago    | 2 | 43 | 43 (100%)  | 0          | 0          |
|                         | Agago    | 3 | 43 | 43 (100%)  | 0          | 0          |
|                         | Amolatar | 1 | 48 | 48 (100%)  | 0          | 0          |
|                         | Amolatar | 2 | 44 | 44 (100%)  | 0          | 0          |
|                         | Amolatar | 3 | 39 | 39 (100%)  | 0          | 0          |
|                         | Arua     | 1 | 33 | 33 (100%)  | 0          | 0          |
|                         | Arua     | 2 | 41 | 41 (100%)  | 0          | 0          |

|         |   |    |           |   |   |
|---------|---|----|-----------|---|---|
| Arua    | 3 | 44 | 44 (100%) | 0 | 0 |
| Jinja   | 1 | 43 | 43 (100%) | 0 | 0 |
| Jinja   | 2 | 42 | 42 (100%) | 0 | 0 |
| Jinja   | 3 | 43 | 43 (100%) | 0 | 0 |
| Kabale  | 1 | 47 | 47 (100%) | 0 | 0 |
| Kabale  | 2 | 48 | 48 (100%) | 0 | 0 |
| Kabale  | 3 | 18 | 18 (100%) | 0 | 0 |
| Kanungu | 1 | 45 | 45 (100%) | 0 | 0 |
| Kanungu | 2 | 42 | 41 (100%) | 0 | 0 |
| Kanungu | 3 | 46 | 46 (100%) | 0 | 0 |
| Kole    | 1 | 35 | 35 (100%) | 0 | 0 |
| Kole    | 2 | 27 | 27 (100%) | 0 | 0 |
| Kole    | 3 | 43 | 43 (100%) | 0 | 0 |
| Lamwo   | 1 | 35 | 35 (100%) | 0 | 0 |
| Lamwo   | 2 | 41 | 41 (100%) | 0 | 0 |
| Lamwo   | 3 | 45 | 45 (100%) | 0 | 0 |
| Mubende | 1 | 41 | 41 (100%) | 0 | 0 |
| Mubende | 2 | 44 | 44 (100%) | 0 | 0 |
| Mubende | 3 | 42 | 42 (100%) | 0 | 0 |
| Tororo  | 1 | 46 | 46 (100%) | 0 | 0 |
| Tororo  | 2 | 34 | 34 (100%) | 0 | 0 |
| Tororo  | 3 | 43 | 43 (100%) | 0 | 0 |

N, number of samples.
